# Supplementary material
Source: PubMed Central journal article supplement (PMC5385850)
Supplement: NIHMS751315-supplement-Supplementary_Figure.pdf [file NIHMS751315-supplement-Supplementary_Figure.pdf]

## Supplementary Figures 1-8 and Supplementary Tables 1-2

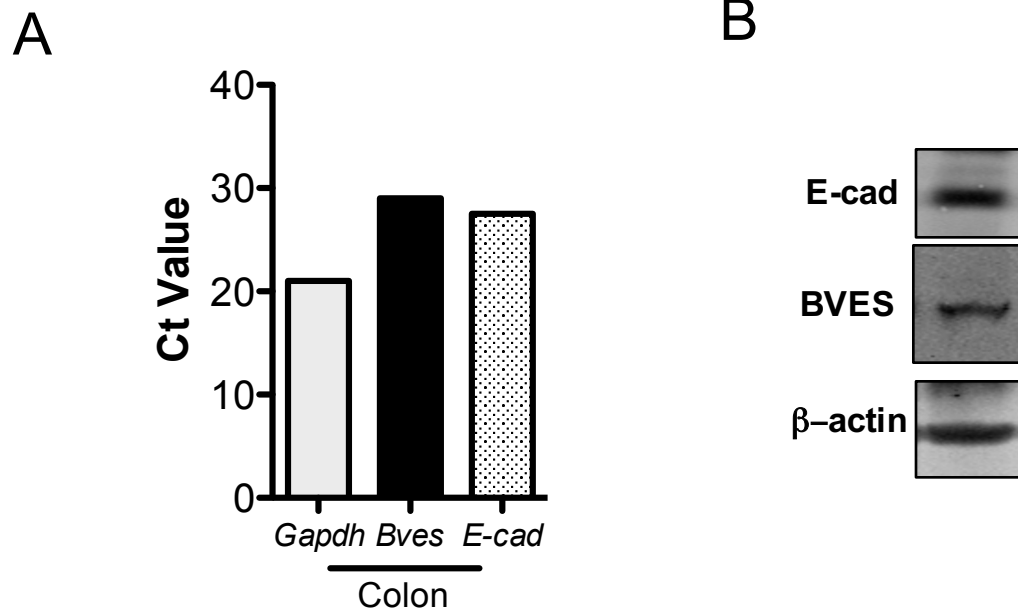

**Supplementary Figure 1 A)** *Ct* values of *Gapdh*, *Bves*, and *E-cadherin* mRNA levels in WT mouse colons. **B)** Immunoblot of E-cadherin, BVES and  $\beta$ -actin in mouse colons.

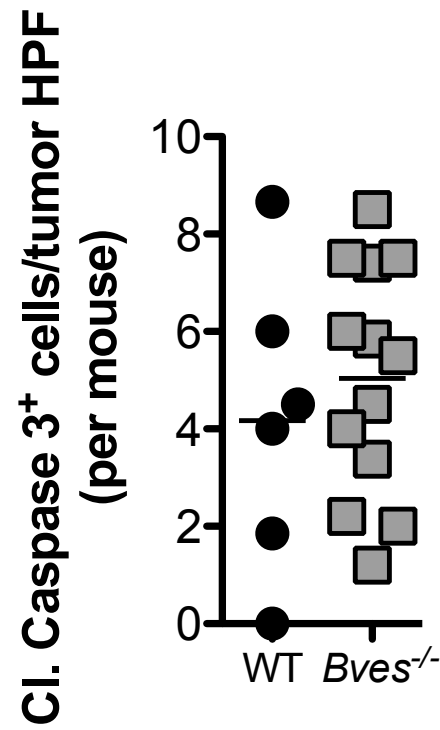

## Supplementary Figure 2

Quantification of cleaved caspase 3 positive cells per tumor high-powered field.

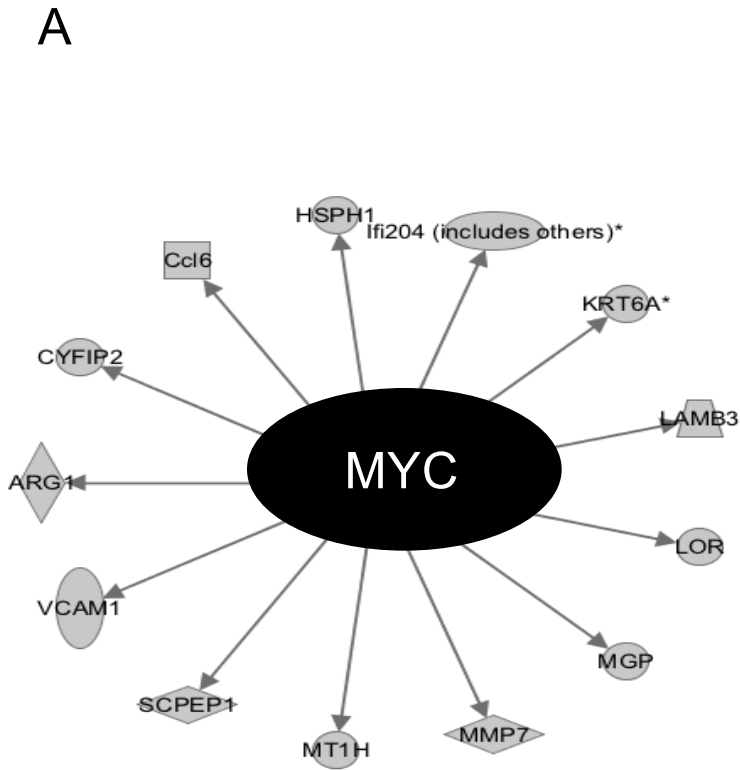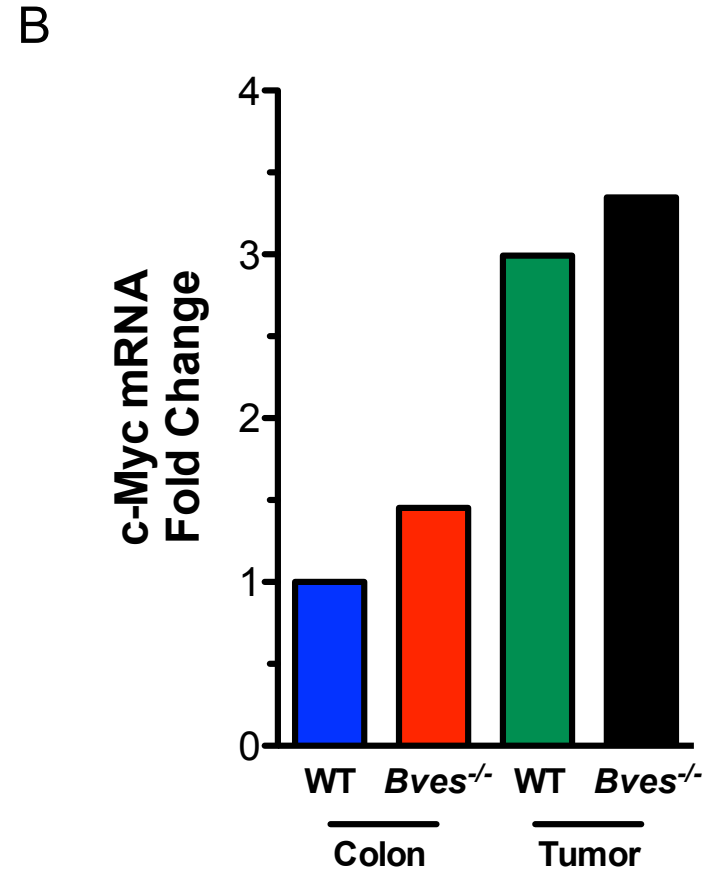

### Supplementary Figure 3

(A) IPA generated schematic of dysregulated c-Myc network in *Bves*<sup>-/-</sup> tumors compared to WT tumors. (B) c-Myc mRNA levels relative to WT colon.

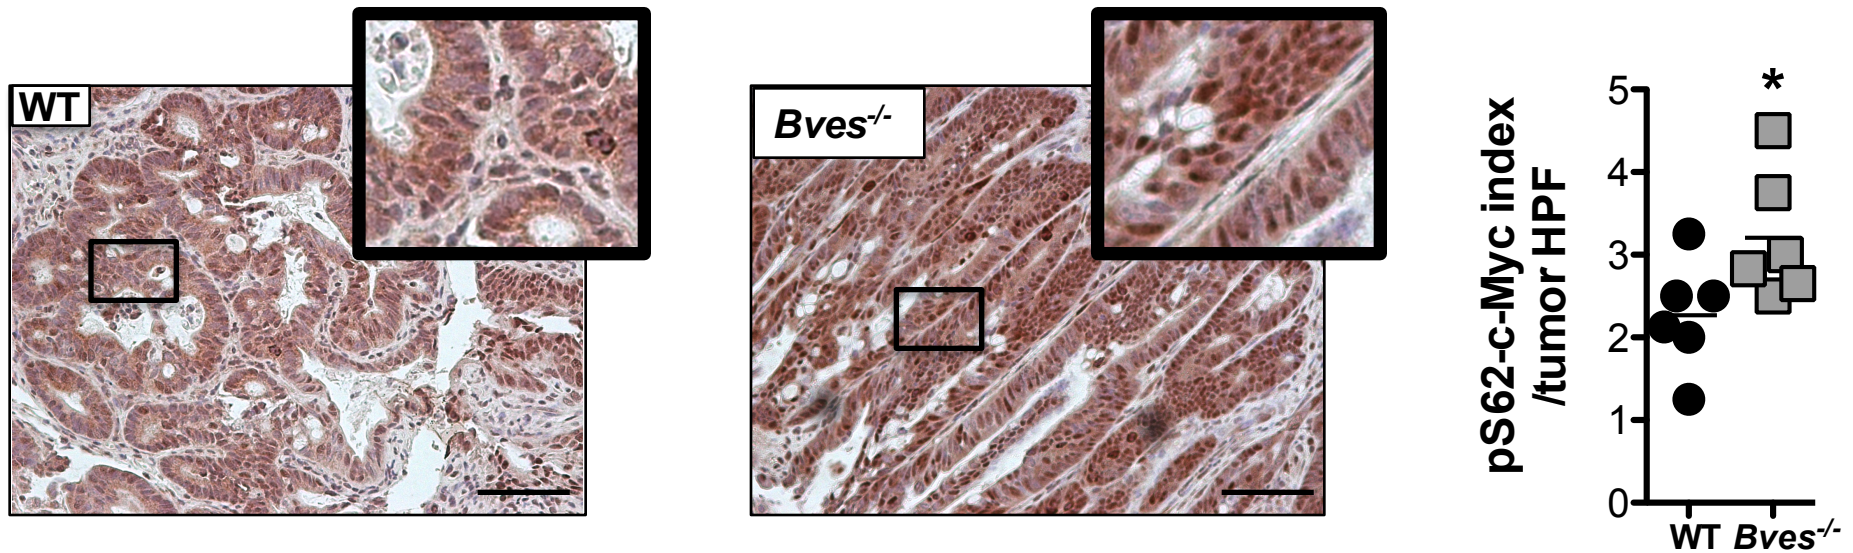

### Supplementary Figure 4

Left: Representative images of immunohistochemistry for intratumoral phosphorylated serine 62 c-Myc staining. Right: Quantification of pS62 c-Myc positive cells per tumor high power field. High power fields were scored according to an index from 1-5 (a score of 1 denotes less than 20% of positive cells per high power field; a score of 2 denotes 20-40%; a score of 3 denotes 40-60%; a score of 4 denotes 60-80%; a score of 5 denotes 80-100%). Each dot represents the average score of each mouse per tumor HPF. A minimum of 5 HPF were scored per mouse. Student's t test, \* $p < 0.05$ . Size standard=50 microns.

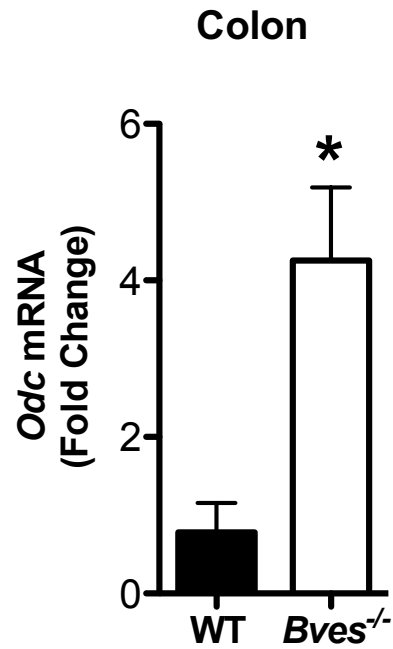

**Supplementary Figure 5**

qPCR for c-Myc transcriptional target *Odc* in colons of WT and *Bves*<sup>-/-</sup> mice at baseline. \*p<0.05

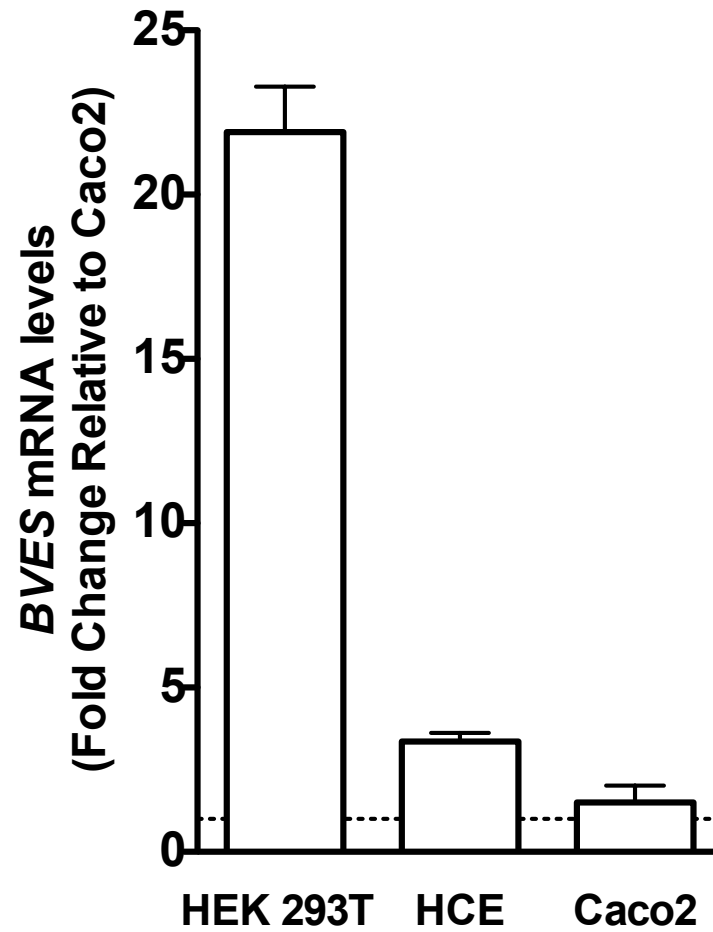

### Supplementary Figure 6

qPCR of *BVES* mRNA in three human cell lines: HEK 293T, Human Corneal Epithelial (HCE), and Caco2.

## Human Corneal Epithelial cells

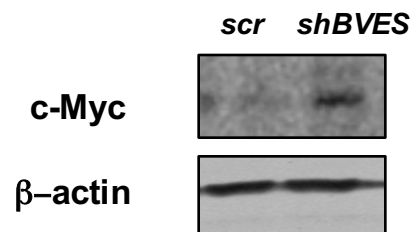

### **Supplementary Figure 7**

Immunoblot of c-Myc after knockdown of *BVES* in the Human Corneal Epithelial (HCE) cell line using shRNAs.

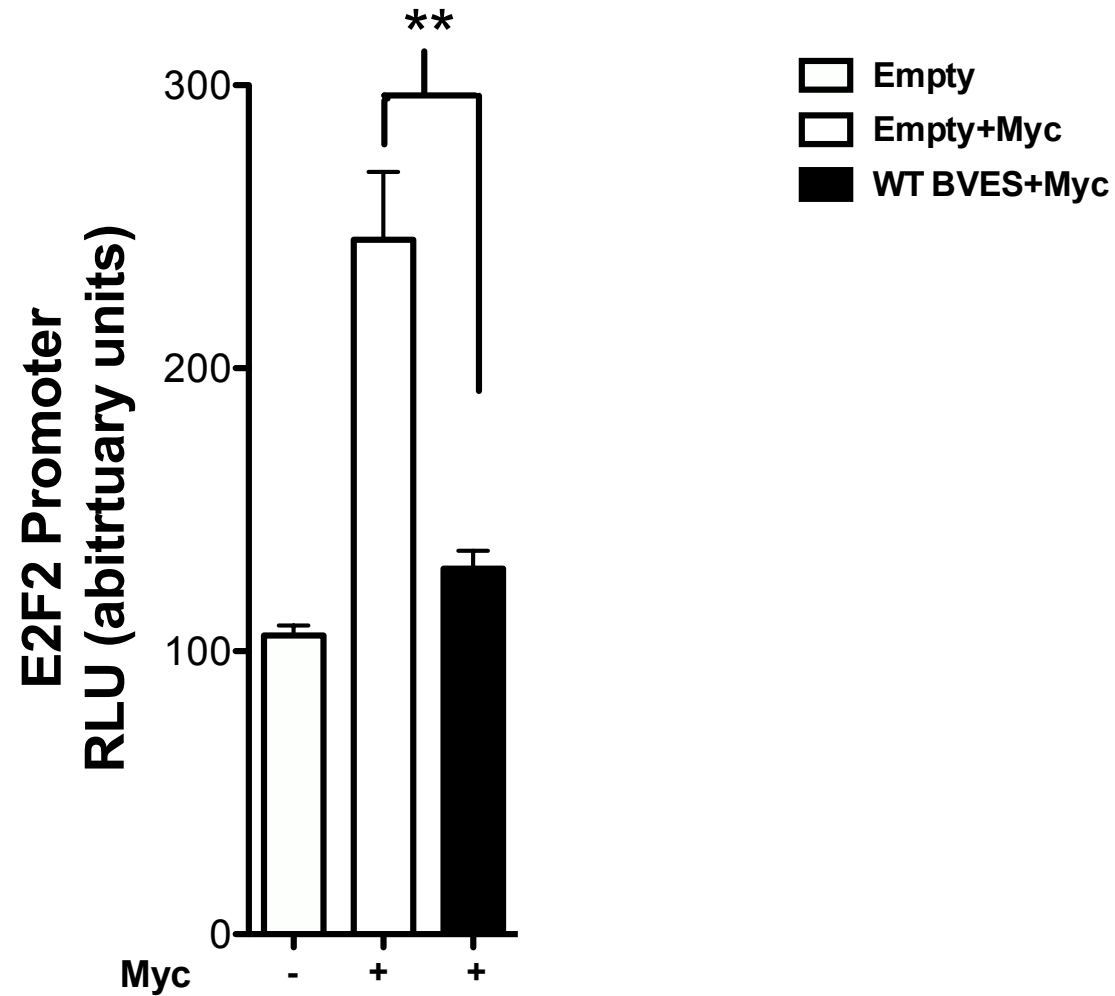

### Supplementary Figure 8

Relative luciferase values of HEK 293T cells co-transfected with an E2F2 reporter and an empty vector, HA-c-Myc and/or V5-BVES. Experiment was performed in technical triplicates and replicated twice. \*\*p<0.01



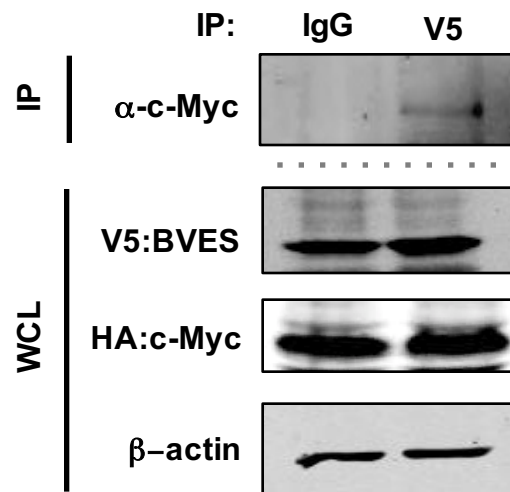

### Supplementary Figure 9

HEK 293T cells were transfected with HA:c-Myc and V5:BVES. V5:BVES was immunoprecipitated followed by immunoblotting for HA:c-Myc. Non-specific IgG was used as a control.

## Supplementary Table 1

| Patient | Biopsy dx | UC NP/P | biopsy dx | Location                  | Distance to Dysplasia(f/anal verge) | Age | Gender | Disease Duration( mo.) | PSC? | Disease Activity | Inflammation |
|---------|-----------|---------|-----------|---------------------------|-------------------------------------|-----|--------|------------------------|------|------------------|--------------|
| 1       | neg       | NP      | neg       | distal                    |                                     | 67  | M      | 30                     | no   |                  | 3-4+         |
| 2       | neg       | NP      | neg       | distal                    |                                     | 70  | F      | 16                     | no   |                  | 3-4+         |
| 3       | tumor     | P       | tumor     | distal                    | 0 cm                                | 55  | F      | 20                     | no   |                  | 4+           |
| 4       | neg       | NP      | neg       | distal                    |                                     | 56  | F      | 10                     | no   |                  |              |
| 5       | tumor     | P       | tumor     | proximal                  | 0 cm                                | 47  | M      | 8                      | no   |                  | ?            |
| 6       | tumor     | P       | tumor     | proximal                  | 0 cm                                | 31  | M      | 10                     | no   |                  | ?            |
| 7       | neg       | NP      | neg       | distal                    |                                     | 48  | M      | 9                      | no   |                  | 3-4+         |
| 8       | neg       | P       | neg       | distal                    |                                     | 67  | M      | 30                     | no   |                  | 0            |
| 9       | neg       | NP      | neg       | distal                    |                                     | 41  | F      | 20                     | no   |                  | 2-3+         |
| 10      | neg       | NP      | neg       | distal                    |                                     | 63  | M      | 39                     | no   |                  |              |
| 11      | neg       | NP      | neg       | distal                    |                                     | 31  | M      | 8                      | no   |                  | 3-4+         |
| 12      | neg       | NP      | neg       | distal                    |                                     | 49  | F      | 20                     | no   |                  | 1-2+         |
| 13      | HGD       | P       | HGD       | 83 cm                     | 0 cm                                | 36  | M      | 8                      | yes  | marked activity  | 4+           |
| 14      | HGD       | P       | HGD       | (C2)next to rectal pieces | 0 cm                                | 53  | F      | NA                     | no?  |                  | 4+           |
| 15      | neg       | NP      | neg       | 7 cm                      |                                     | 59  | M      | 0.25                   |      | no data          | active       |
| 16      | neg       | NP      | neg       | 14 cm                     |                                     | 51  | F      | 20                     | no   | no data          | 3+           |
| 17      | neg       | NP      | neg       | 15 cm                     |                                     | 46  | F      | 17                     | no   | no data          | 0            |
| 18      | neg       | P       | neg       | 3.4 cm                    | 78.3 cm                             | 36  | M      | 11                     | yes  | no data          | 0            |
| 19      | HGD       | P       | HGD       | 92 cm                     | 0 cm                                | 58  | M      | 29                     | yes  | focal activity   | 0            |
| 20      | HGD       | P       | HGD       | 3 cm                      | 0 cm                                | 32  | M      | 16                     | no   | active           | 1+           |
| 21      | HGD       | P       | LGD+HGD   | 19 cm                     | 0 cm                                | 48  | M      | 10                     | no   | focal activity   | 0            |
| 22      | HGD       | P       | HGD       | 4 cm                      | 0 cm                                | 33  | M      | 13                     | no   | focal active     | 4+           |
| 23      | HGD       | P       | HGD       | 70.4 cm                   | 6.4cm to CA                         | 51  | F      | 13                     | yes  | active           | 1+           |
| 24      | HGD       | P       | HGD       | 31.2 cm                   | 0 cm                                | 33  | F      | 22                     | no   | no data          | 1+           |
| 25      | neg       | P       | neg       | 14.4 cm                   | 18.4 cm                             | 34  | M      | 17                     | yes  | active           | 1+           |

## Supplementary Table 2

|                                   | <b>UC Patients With Cancer<br/>(N=14)</b>                                                                                       | <b>UC Patients with Dysplasia<br/>(N=5)</b> | <b>UC patients<br/>(N=13)</b> | <b>Normal (N=11)</b>      |
|-----------------------------------|---------------------------------------------------------------------------------------------------------------------------------|---------------------------------------------|-------------------------------|---------------------------|
| <b>Average Age (sd)</b>           | 51.4 + 18.3                                                                                                                     | 53.2 + 15.5                                 | 55+ 10.2                      | 60.9 + 11.5               |
| <b>Gender</b>                     | 6 Males, 8 Females                                                                                                              | 4 Males, 1 Female                           | 8 Males, 5 Females            | 5 Males, 6 Females        |
| <b>BMI</b>                        | 26 + 9.2                                                                                                                        | n/a                                         | n/a                           | 26.6 + 3.1                |
| <b>Race</b>                       | White (N=14)                                                                                                                    | n/a                                         | n/a                           | Black (N=1), White (N=10) |
| <b>Tumor Grade</b>                | Grade 1 (N=3), Grade 2<br>(N=2), Grade 3 (N=9)                                                                                  | n/a                                         | n/a                           | n/a                       |
| <b>Location if known</b>          | Descending (N=2),<br>Transverse (N=2), Left<br>(N=1), Ascending (N=1),<br>Sigmoid (N=2), Rectum<br>(N=4), Hepatic fixture (N=1) | n/a                                         | n/a                           | n/a                       |
| <b>Lymph Node<br/>Involvement</b> | Positive (N=9), Negative<br>(N=5)                                                                                               | n/a                                         | n/a                           | n/a                       |
| <b>Average Tumor Size</b>         | 4.2 + 2.9 cm                                                                                                                    | n/a                                         | n/a                           | n/a                       |
| <b>Mesenteric Deposits</b>        | Absent (N=7), Present<br>(N=8)                                                                                                  | n/a                                         | n/a                           | n/a                       |
